# Supplementary material
Source: Springer Nature journal article supplement (https://www.springermedizin.de/resource/supplementary/12865_2008_214_MOESM4_ESM.pdf/9428754)

**A**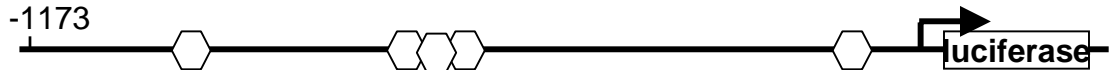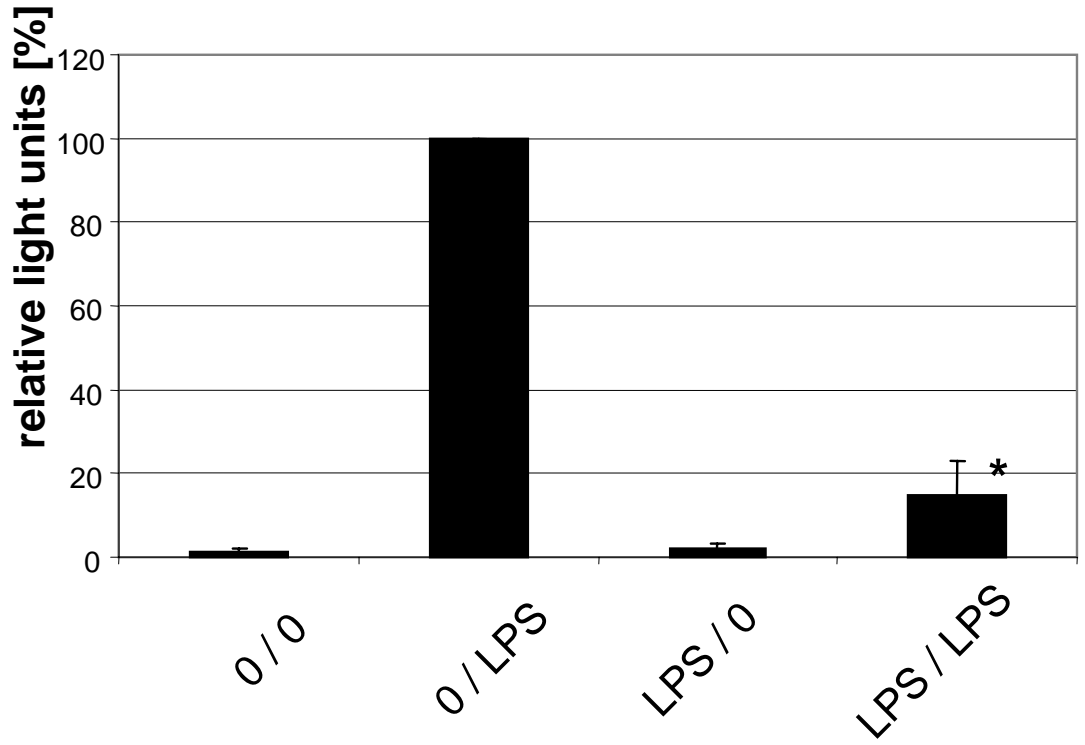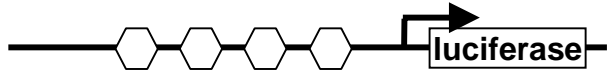**B**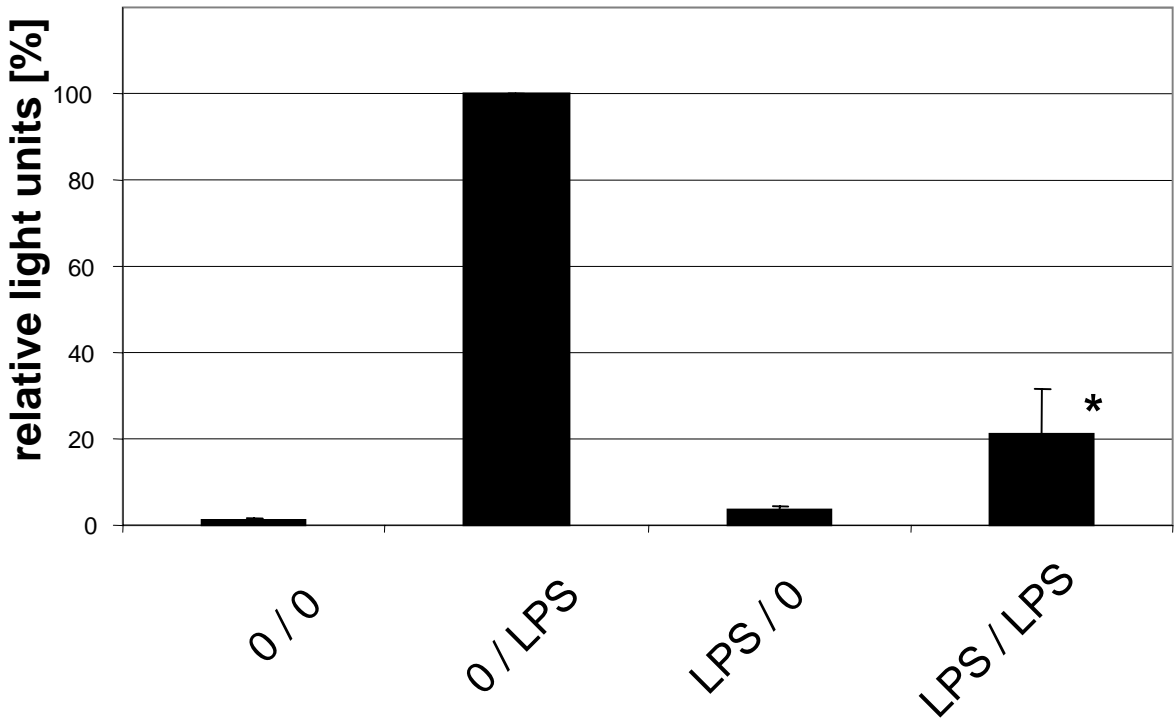

Supplement: MOESM4 [file 9428754]
